# Supplementary material for: Stretching and folding of 2-nanometer hydrocarbon rods
Source: Royal Society of Chemistry journal article supplement (doi:10.1039/c4sm00508b), 2014-01-01
Supplement: c4sm00508b1.pdf [file c4sm00508b1.pdf]

# Stretching and folding of 2-nanometer hydrocarbon rods

## Supplementary Information

Nils O. B. Lüttschwager, Martin A. Suhm

*Institut für Physikalische Chemie, Universität Göttingen, Tammannstr. 6, 37077 Göttingen,  
Germany*

Table S1: Further measurement conditions.  $n$ =chain length,  $\vartheta$ =substance preparation temperature,  $p_0$ =stagnation pressure of the carrier gas,  $p_b$ =background pressure in the vacuum chamber during the expansion,  $t$ =total exposure time. “scans” is the number of averaged spectra.

| $n$ | $\vartheta/^\circ\text{C}$ | He + 4% CF <sub>4</sub> <sup>*</sup> |       | He <sup>†</sup> |       |              |       |              |       |
|-----|----------------------------|--------------------------------------|-------|-----------------|-------|--------------|-------|--------------|-------|
|     |                            | $t/\text{h}$                         | scans | $t/\text{h}$    | scans | $t/\text{h}$ | scans | $t/\text{h}$ | scans |
| 13  | 37                         | 2.0                                  | 24    | 2.0             | 24    | 1.0          | 6     | 0.7          | 28    |
| 16  | 65                         | 0.5                                  | 6     | 1.5             | 18    | 1.0          | 6     | 0.6          | 24    |
| 17  | 75                         | 0.5                                  | 6     | 0.5             | 6     | 1.0          | 6     | 0.7          | 28    |
| 18  | 85–97                      | 1.0                                  | 12    | 2.2             | 26    | 1.0          | 6     | 1.4          | 28    |
| 19  | 95                         | 0.7                                  | 8     | 1.3             | 16    | 1.0          | 6     | 1.4          | 28    |
| 20  | 105                        | 0.7                                  | 8     | 0.7             | 8     | 1.0          | 6     | 0.6          | 24    |
| 21  | 125                        | —                                    | —     | 1.3             | 8     | 1.0          | 6     | 0.3          | 6     |

\*  $p_0 = 0.9$  bar,  $p_b = 1.3$  mbar

†  $p_0 = 0.5\text{--}0.6$  bar,  $p_b = 0.8\text{--}0.9$  mbar

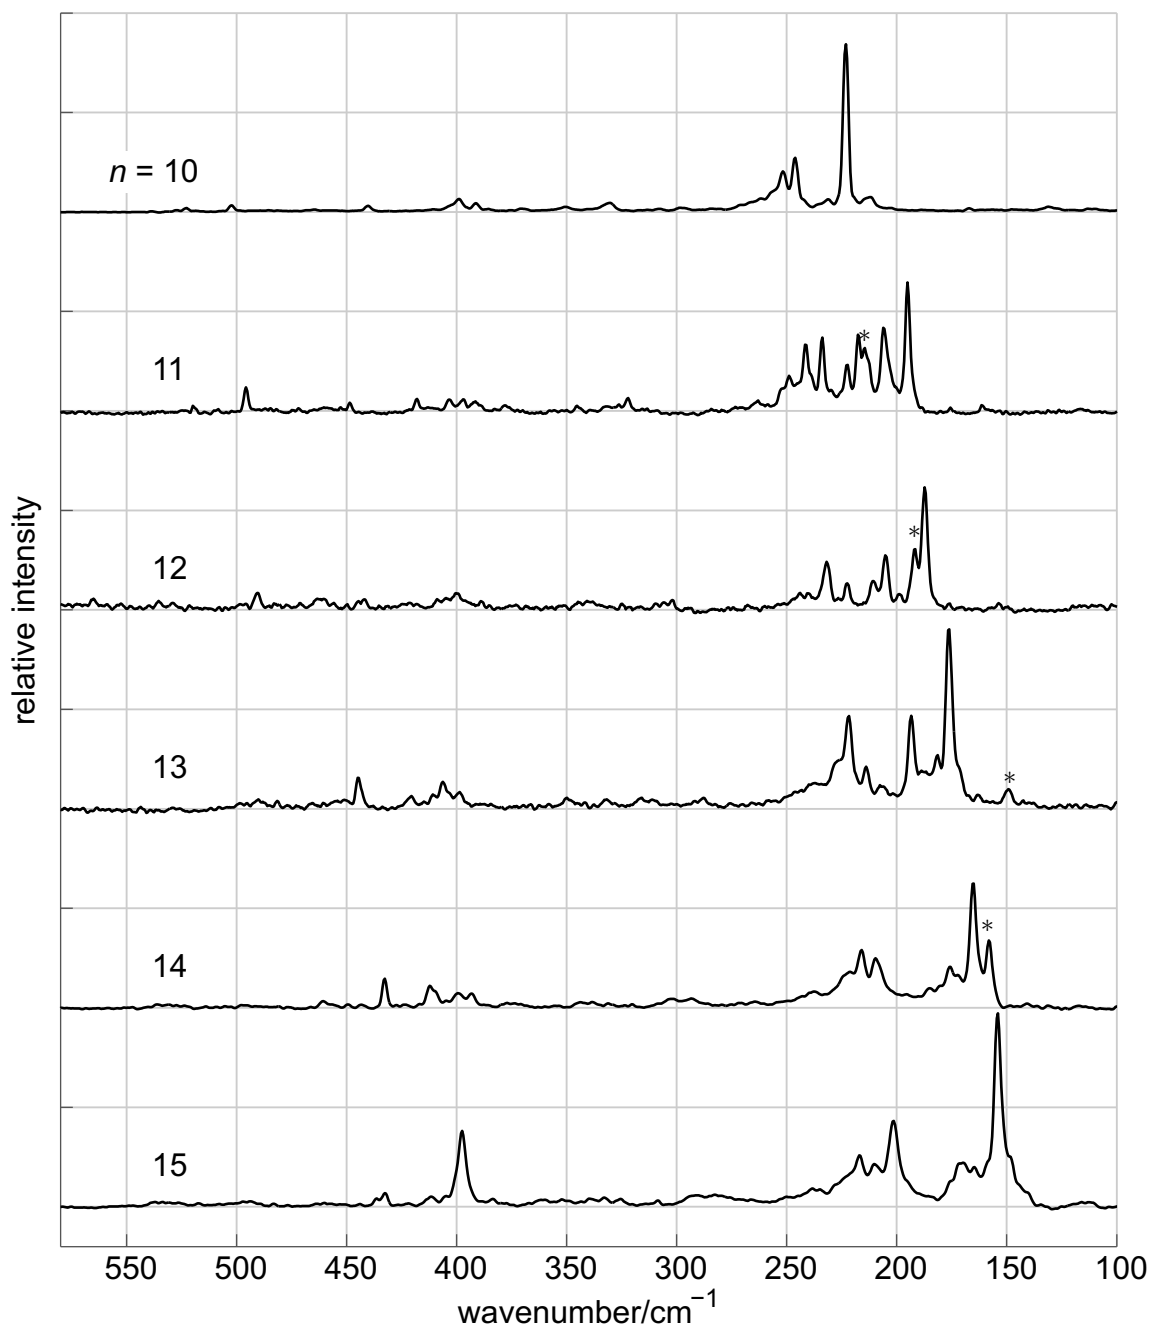

Figure S1: Averaged jet-cooled Raman spectra of the low-frequency region of alkanes with chain lengths  $n=10$ – $15$  in He expansions. Spectra are scaled to the overall LAM-1 peak intensity including signals of coupling vibrations ( $n=10, 13$ : harmonic mode mixing,  $n=12, 14$ : anharmonic Fermi resonance, marked with \*).
